# Supplementary material
Source: bioRxiv or medRxiv preprint supplement (https://www.biorxiv.org/highwire/filestream/58660/field_highwire_adjunct_files/0/193391-1.pdf)
Supplement: Supplementary file [file 193391-1.pdf]

# Supporting Information:

## Efficient Multi-task chemogenomics for drug specificity prediction

Benoit Playe,<sup>†,¶</sup> Chloé-Agathe Azencott,<sup>†,¶</sup> and Véronique Stoven<sup>\*,†,¶</sup>

<sup>†</sup>*Mines ParisTech, PSL Research University, Centre for Computational Biology, 35 Rue Saint-Honoré, F-77305 Fontainebleau Cedex, France*

<sup>‡</sup>*Institut Curie F-75248 Paris, France*

E-mail: benoit.playe@mines-paristech.fr

### Supplementary Figure F1

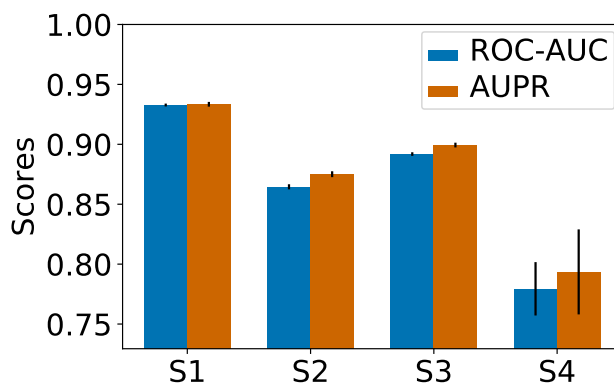

Figure 1: Scores of *MT* SVM chemogenomics on  $S_1 - S_4$  settings obtained with the 5-fold CV scheme.

## Supplementary Figure F2

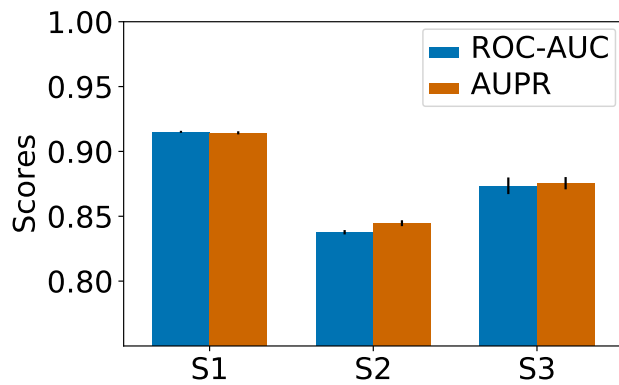

Figure 2: Scores of *MT* Kernel Ridge regression on S1/2/3/4 in nested-5foldCV

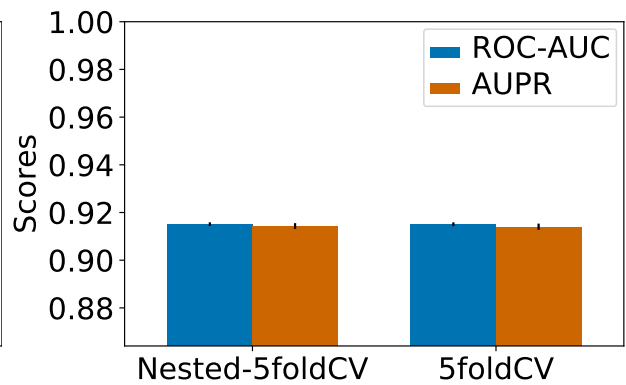

Figure 3: Scores of *MT* Kernel Ridge regression on S1 depending on CV scheme

## Supplementary Figure F3

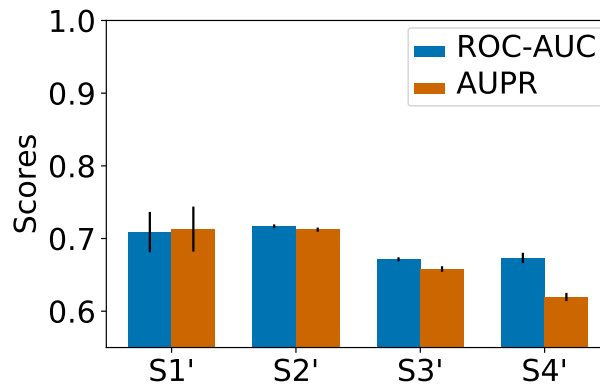

Figure 4: Scores of *MT* SVM method on S1', S2', S3' and S4' datasets with nested-5-fold CV

## Supplementary Figure F4

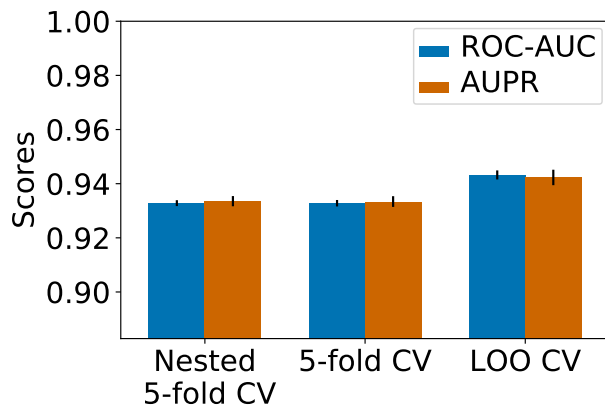

Figure 5: Scores of the *MT* method on S1 depending on CV scheme.

Overall, all CV schemes provide high prediction performance on this dataset, in the range of 0.93-0.94 in AUC and AUPR. The *Nested 5-fold CV* leads to performance very close to those of *5-fold CV*, showing that on the S1 dataset, *5-fold CV* did not suffer from overestimation of the performance due to data over-fitting. *LOO CV* leads to slightly better results, although very close to those of the other CV schemes. In general, the *LOO CV* scheme is expected to provide better results because the model is trained on more data points than *5-fold CV*. Again, this problem seems to be limited here, since the performance of *LOO CV* does not differ much from that of *Nested 5-fold CV*.

## Supplementary Tables

Table 1: scores corresponding to 5-fold cross-validated *MT* on S1–S4

| Setting | AUC             | AUPR            |
|---------|-----------------|-----------------|
| S1      | $93.4 \pm 0.11$ | $93.4 \pm 0.19$ |
| S2      | $86.3 \pm 0.32$ | $87.4 \pm 0.35$ |
| S3      | $89.2 \pm 0.58$ | $89.9 \pm 0.46$ |
| S4      | $81.0 \pm 2.08$ | $82.2 \pm 2.40$ |

Table 2: scores corresponding to *MT* on S1 depending on the CV scheme

| CV scheme        | AUC             | AUPR            |
|------------------|-----------------|-----------------|
| Nested-5-fold CV | $93.3 \pm 0.11$ | $93.4 \pm 0.19$ |
| 5-fold CV        | $93.3 \pm 0.12$ | $93.3 \pm 0.20$ |
| LOO-CV           | $94.3 \pm 0.17$ | $94.2 \pm 0.29$ |

Table 3: scores corresponding to Nested 5-fold cross-validated *MT* on S1'-S4'

| Dataset | AUC             | AUPR            |
|---------|-----------------|-----------------|
| S1'     | $69.3 \pm 5.16$ | $79.8 \pm 1.82$ |
| S2'     | $69.4 \pm 0.68$ | $66.9 \pm 0.53$ |
| S3'     | $66.3 \pm 0.66$ | $62.4 \pm 0.95$ |
| S4'     | $46.3 \pm 2.33$ | $34.1 \pm 0.95$ |

Table 4: values corresponding to LOO-CV *ligand-based ST* and *MT-intra* on S1

| model/nb_neg<br>in intra<br>task | 1                | 2                | 5                | 10               | 50               | full             |
|----------------------------------|------------------|------------------|------------------|------------------|------------------|------------------|
| ligand-<br>based<br>ST           | $91.02 \pm 0.26$ | $91.39 \pm 0.32$ | $92.2 \pm 0.23$  | $92.84 \pm 0.2$  | $93.43 \pm 0.14$ | $91.62 \pm 0.18$ |
| KronSVM                          | $94.19 \pm 0.13$ | $94.72 \pm 0.18$ | $95.19 \pm 0.18$ | $95.49 \pm 0.12$ | $95.59 \pm 0.09$ | $95.29 \pm 0.04$ |

Table 5: values corresponding to LOO-CV *NN-MT* on S1

| nb_pos/nb_neg in NN intra task | 1                | 2                | 5                | 10               |
|--------------------------------|------------------|------------------|------------------|------------------|
| 0                              | $95.49 \pm 0.12$ | $95.49 \pm 0.12$ | $95.49 \pm 0.12$ | $95.49 \pm 0.12$ |
| 1                              | $95.79 \pm 0.1$  | $95.82 \pm 0.1$  | $95.78 \pm 0.1$  | $95.69 \pm 0.13$ |
| 5                              | $96.09 \pm 0.15$ | $96.05 \pm 0.16$ | $95.87 \pm 0.13$ | $95.7 \pm 0.11$  |
| 10                             | $96.2 \pm 0.13$  | $96.11 \pm 0.16$ | $95.93 \pm 0.12$ | $95.7 \pm 0.09$  |
| 50                             | $96.18 \pm 0.09$ | $96.18 \pm 0.07$ | $96.0 \pm 0.08$  | $95.75 \pm 0.09$ |

Table 6: values corresponding to LOO-CV *RN-MT* on S1

| nb_pos/nb_neg in RN extra task | 1                | 2                | 5                | 10               |
|--------------------------------|------------------|------------------|------------------|------------------|
| 0                              | $95.49 \pm 0.12$ | $95.49 \pm 0.12$ | $95.49 \pm 0.12$ | $95.49 \pm 0.12$ |
| 1                              | $95.65 \pm 0.14$ | $95.63 \pm 0.14$ | $95.59 \pm 0.14$ | $95.54 \pm 0.14$ |
| 5                              | $95.89 \pm 0.15$ | $95.83 \pm 0.15$ | $95.69 \pm 0.14$ | $95.52 \pm 0.14$ |
| 10                             | $96.02 \pm 0.16$ | $95.93 \pm 0.16$ | $95.72 \pm 0.15$ | $95.48 \pm 0.14$ |
| 50                             | $95.86 \pm 0.17$ | $95.76 \pm 0.16$ | $95.55 \pm 0.14$ | $95.33 \pm 0.14$ |

Table 7: values corresponding to LOO-CV *MT-intra* on S1 with similarity constraint on intra-task pairs

| $\theta$ | 1                | 2                | 10               | 50               |
|----------|------------------|------------------|------------------|------------------|
| 20       | $66.37 \pm 1.18$ | $66.9 \pm 0.57$  | $67.19 \pm 0.72$ | $67.34 \pm 0.35$ |
| 30       | $70.41 \pm 0.85$ | $70.87 \pm 0.61$ | $71.65 \pm 0.54$ | $71.63 \pm 0.51$ |
| 50       | $72.3 \pm 0.52$  | $72.52 \pm 0.71$ | $73.79 \pm 0.54$ | $73.78 \pm 0.59$ |
| 80       | $75.55 \pm 0.35$ | $76.46 \pm 0.43$ | $77.83 \pm 0.51$ | $77.49 \pm 0.26$ |

Table 8: values corresponding to LOO-CV *ligand-based ST* on S1 with similarity constraint on intra-task pairs

| centile/ratio | 1                | 2                | 10               | 50               |
|---------------|------------------|------------------|------------------|------------------|
| 20            | $66.0 \pm 1.08$  | $65.84 \pm 1.11$ | $69.62 \pm 0.63$ | $72.24 \pm 0.36$ |
| 30            | $64.86 \pm 0.64$ | $65.87 \pm 0.42$ | $70.04 \pm 0.9$  | $72.3 \pm 0.74$  |
| 50            | $67.11 \pm 0.81$ | $67.35 \pm 0.79$ | $71.28 \pm 0.81$ | $73.09 \pm 0.6$  |
| 80            | $69.13 \pm 1.02$ | $70.18 \pm 0.33$ | $74.09 \pm 0.85$ | $75.77 \pm 1.24$ |

Table 9: values corresponding to LOO-CV *NN-MT* on S1 with similarity constraint on intra-task pairs ( $\theta = 20$ )

| nb_pos/nb_neg ratio in NN extra task | 1                | 2                | 5                |
|--------------------------------------|------------------|------------------|------------------|
| 0                                    | $66.37 \pm 1.18$ | $66.37 \pm 1.18$ | $66.37 \pm 1.18$ |
| 1                                    | $85.64 \pm 0.83$ | $84.61 \pm 0.73$ | $82.89 \pm 0.55$ |
| 5                                    | $85.99 \pm 0.76$ | $84.81 \pm 0.37$ | $83.15 \pm 0.5$  |
| 10                                   | $84.65 \pm 0.86$ | $83.09 \pm 0.36$ | $81.69 \pm 0.52$ |
| 50                                   | $77.83 \pm 0.58$ | $77.11 \pm 0.39$ | $77.49 \pm 0.3$  |

Table 10: values corresponding to LOO-CV *NN-MT* on S1 with similarity constraint on intra-task pairs ( $\theta = 80$ )

| nb_pos/nb_neg ratio in NN extra task | 1                | 2                | 5                |
|--------------------------------------|------------------|------------------|------------------|
| 0                                    | $75.55 \pm 0.35$ | $75.55 \pm 0.35$ | $75.55 \pm 0.35$ |
| 1                                    | $86.12 \pm 0.34$ | $85.76 \pm 0.36$ | $84.87 \pm 0.19$ |
| 5                                    | $86.98 \pm 0.37$ | $86.52 \pm 0.42$ | $87.51 \pm 0.22$ |
| 10                                   | $86.82 \pm 0.41$ | $86.02 \pm 0.44$ | $87.24 \pm 0.44$ |
| 50                                   | $82.72 \pm 0.49$ | $82.73 \pm 0.42$ | $81.66 \pm 0.27$ |

Table 11: values corresponding to LOO-CV *RN-MT* on S1 with similarity constraint on intra-task pairs ( $\theta = 20$ )

| nb_pos/nb_neg ratio in RN extra task | 1                | 2                | 5                |
|--------------------------------------|------------------|------------------|------------------|
| 0                                    | $66.37 \pm 1.18$ | $66.37 \pm 1.18$ | $66.37 \pm 1.18$ |
| 1                                    | $63.83 \pm 1.19$ | $63.83 \pm 0.81$ | $66.06 \pm 0.97$ |
| 5                                    | $65.77 \pm 0.89$ | $65.98 \pm 0.47$ | $67.31 \pm 0.35$ |
| 10                                   | $67.55 \pm 1.07$ | $67.06 \pm 1.05$ | $65.65 \pm 0.4$  |
| 50                                   | $69.64 \pm 0.98$ | $70.19 \pm 0.88$ | $70.37 \pm 0.56$ |

Table 12: values corresponding to LOO-CV *RN-MT* on S1 with similarity constraint on intra-task pairs ( $\theta = 80$ )

| nb_pos/nb_neg ratio in RN extra task | 1                | 2                | 5                |
|--------------------------------------|------------------|------------------|------------------|
| 0                                    | $75.55 \pm 0.35$ | $75.55 \pm 0.35$ | $75.55 \pm 0.35$ |
| 1                                    | $72.15 \pm 0.25$ | $72.35 \pm 0.19$ | $75.51 \pm 0.51$ |
| 5                                    | $74.57 \pm 0.38$ | $75.73 \pm 0.32$ | $78.46 \pm 0.36$ |
| 10                                   | $75.78 \pm 0.24$ | $75.1 \pm 0.63$  | $77.43 \pm 0.35$ |
| 50                                   | $76.94 \pm 0.44$ | $75.91 \pm 0.22$ | $75.31 \pm 0.27$ |

Table 13: values corresponding to LOO-CV *MT-intra* , *NN-MT*, *RN-MT* on S1 with similarity constraint on intra-task pairs

| model/centile | 20               | 30               | 50               | 80               |
|---------------|------------------|------------------|------------------|------------------|
| MT-intra      | $66.37 \pm 1.18$ | $70.41 \pm 0.85$ | $72.3 \pm 0.52$  | $75.55 \pm 0.35$ |
| NN-MT         | $84.65 \pm 0.86$ | $85.68 \pm 0.52$ | $86.24 \pm 0.45$ | $86.82 \pm 0.41$ |
| RN-MT         | $67.55 \pm 1.07$ | $70.55 \pm 0.66$ | $72.36 \pm 0.36$ | $75.78 \pm 0.24$ |

Table 14: values corresponding to LOO-CV *NN-MT* on S1 with similarity constraint on intra- and extra-task pairs ( $\theta = 20$ )

| nb_pos/nb_neg ratio in NN extra task | 1                | 2                | 5                |
|--------------------------------------|------------------|------------------|------------------|
| 1                                    | $63.39 \pm 0.82$ | $64.15 \pm 1.3$  | $65.87 \pm 0.5$  |
| 5                                    | $64.63 \pm 0.84$ | $64.98 \pm 0.56$ | $66.02 \pm 0.24$ |
| 10                                   | $65.64 \pm 0.87$ | $65.61 \pm 0.7$  | $64.53 \pm 0.85$ |
| 50                                   | $64.88 \pm 0.67$ | $64.24 \pm 0.82$ | $63.04 \pm 0.27$ |

Table 15: values corresponding to LOO-CV *NN-MT* on S1 with similarity constraint on intra- and extra-task pairs ( $\theta = 80$ )

| nb_pos/nb_neg ratio in NN extra task | 1                | 2                | 5                |
|--------------------------------------|------------------|------------------|------------------|
| 1                                    | $72.14 \pm 0.33$ | $71.91 \pm 0.37$ | $75.65 \pm 0.34$ |
| 5                                    | $73.35 \pm 0.09$ | $75.5 \pm 0.27$  | $77.58 \pm 0.31$ |
| 10                                   | $73.88 \pm 0.35$ | $73.83 \pm 0.62$ | $75.9 \pm 0.59$  |
| 50                                   | $72.49 \pm 0.49$ | $72.15 \pm 0.54$ | $70.72 \pm 0.67$ |

Table 16: values corresponding to LOO-CV *RN-MT* on S1 with similarity constraint on intra- and extra-task pairs ( $\theta = 20$ )

| nb_pos/nb_neg ratio in RN extra task | 1                | 2                | 5                |
|--------------------------------------|------------------|------------------|------------------|
| 1                                    | $63.0 \pm 0.55$  | $64.24 \pm 0.34$ | $65.99 \pm 0.64$ |
| 5                                    | $65.68 \pm 0.15$ | $64.53 \pm 0.92$ | $67.27 \pm 1.1$  |
| 10                                   | $66.01 \pm 0.74$ | $64.39 \pm 1.24$ | $62.99 \pm 0.8$  |
| 50                                   | $66.45 \pm 0.66$ | $65.75 \pm 0.47$ | $62.23 \pm 0.66$ |

Table 17: values corresponding to LOO-CV *RN-MT* on S1 with similarity constraint on intra- and extra-task pairs ( $\theta = 80$ )

| nb_pos/nb_neg ratio in RN extra task | 1                | 2                | 5                |
|--------------------------------------|------------------|------------------|------------------|
| 1                                    | $72.43 \pm 0.11$ | $71.99 \pm 0.44$ | $75.48 \pm 0.36$ |
| 5                                    | $73.92 \pm 0.15$ | $75.48 \pm 0.33$ | $78.1 \pm 0.28$  |
| 10                                   | $74.5 \pm 0.18$  | $73.77 \pm 0.57$ | $76.7 \pm 0.34$  |
| 50                                   | $73.17 \pm 0.27$ | $71.74 \pm 0.54$ | $69.14 \pm 0.44$ |

Table 18: GPCR dataset: values corresponding to LOO-CV *NN-MT* with family’s hierarchy based kernel

| nb_pos/nb_neg ratio in NN extra task | 1                | 2                | 5                | 10               | 20               |
|--------------------------------------|------------------|------------------|------------------|------------------|------------------|
| 0                                    | $96.3 \pm 0.42$  | $96.3 \pm 0.42$  | $96.3 \pm 0.42$  | $96.3 \pm 0.42$  | $96.3 \pm 0.42$  |
| 1                                    | $96.43 \pm 0.34$ | $96.55 \pm 0.3$  | $96.77 \pm 0.28$ | $96.9 \pm 0.28$  | $96.98 \pm 0.26$ |
| 10                                   | $96.46 \pm 0.2$  | $96.65 \pm 0.22$ | $96.84 \pm 0.18$ | $97.01 \pm 0.18$ | $97.05 \pm 0.19$ |
| 50                                   | $96.32 \pm 0.35$ | $96.5 \pm 0.25$  | $96.66 \pm 0.21$ | $96.63 \pm 0.17$ | $96.65 \pm 0.22$ |
| 100                                  | $95.31 \pm 0.27$ | $95.88 \pm 0.26$ | $96.57 \pm 0.22$ | $96.74 \pm 0.19$ | $96.56 \pm 0.21$ |

Table 19: GPCR dataset: values corresponding to LOO-CV *NN-MT* with sequence based kernel

| nb_pos/nb_neg<br>ratio in NN<br>extra task | 1                | 2                | 5                | 10               | 20               |
|--------------------------------------------|------------------|------------------|------------------|------------------|------------------|
| 0                                          | $92.68 \pm 0.23$ | $92.68 \pm 0.23$ | $92.68 \pm 0.23$ | $92.68 \pm 0.23$ | $92.68 \pm 0.23$ |
| 1                                          | $92.92 \pm 0.19$ | $93.22 \pm 0.22$ | $93.66 \pm 0.21$ | $94.06 \pm 0.18$ | $94.32 \pm 0.19$ |
| 10                                         | $93.55 \pm 0.24$ | $93.97 \pm 0.24$ | $94.6 \pm 0.27$  | $95.14 \pm 0.26$ | $95.47 \pm 0.37$ |
| 50                                         | $93.04 \pm 0.36$ | $93.69 \pm 0.27$ | $95.05 \pm 0.29$ | $95.67 \pm 0.34$ | $95.88 \pm 0.41$ |
| 100                                        | $92.25 \pm 0.26$ | $93.65 \pm 0.29$ | $94.91 \pm 0.29$ | $95.54 \pm 0.34$ | $95.83 \pm 0.39$ |

Table 20: GPCR dataset: values corresponding to LOO-CV *RN-MT* with family's hierarchy based kernel

| nb_pos/nb_neg<br>ratio in RN<br>extra task | 1                | 2                | 5                | 10               | 20               |
|--------------------------------------------|------------------|------------------|------------------|------------------|------------------|
| 0                                          | $96.3 \pm 0.42$  | $96.3 \pm 0.42$  | $96.3 \pm 0.42$  | $96.3 \pm 0.42$  | $96.3 \pm 0.42$  |
| 1                                          | $96.31 \pm 0.4$  | $96.32 \pm 0.39$ | $96.33 \pm 0.39$ | $96.34 \pm 0.38$ | $96.37 \pm 0.4$  |
| 10                                         | $96.21 \pm 0.34$ | $96.23 \pm 0.35$ | $96.26 \pm 0.35$ | $96.31 \pm 0.36$ | $96.52 \pm 0.34$ |
| 50                                         | $96.04 \pm 0.3$  | $96.19 \pm 0.33$ | $96.47 \pm 0.39$ | $96.65 \pm 0.4$  | $96.79 \pm 0.39$ |
| 100                                        | $95.72 \pm 0.31$ | $96.08 \pm 0.36$ | $96.57 \pm 0.45$ | $96.8 \pm 0.51$  | $96.99 \pm 0.34$ |

Table 21: GPCR dataset: values corresponding to LOO-CV *RN-MT* with sequence based kernel

| nb_pos/nb_neg<br>ratio in RN<br>extra task | 1                | 2                | 5                | 10               | 20               |
|--------------------------------------------|------------------|------------------|------------------|------------------|------------------|
| 0                                          | $92.68 \pm 0.23$ | $92.68 \pm 0.23$ | $92.68 \pm 0.23$ | $92.68 \pm 0.23$ | $92.68 \pm 0.23$ |
| 1                                          | $93.23 \pm 0.15$ | $93.19 \pm 0.13$ | $93.17 \pm 0.13$ | $93.14 \pm 0.14$ | $93.08 \pm 0.16$ |
| 10                                         | $93.8 \pm 0.23$  | $93.86 \pm 0.19$ | $94.03 \pm 0.28$ | $94.13 \pm 0.22$ | $94.24 \pm 0.22$ |
| 50                                         | $94.08 \pm 0.1$  | $94.43 \pm 0.11$ | $94.73 \pm 0.21$ | $94.76 \pm 0.25$ | $95.18 \pm 0.27$ |
| 100                                        | $92.76 \pm 0.12$ | $93.84 \pm 0.13$ | $94.85 \pm 0.2$  | $94.9 \pm 0.3$   | $95.47 \pm 0.27$ |



Table 22: Ion Channel dataset: values corresponding to LOO-CV *NN-MT* with family's hierarchy based kernel

| nb_pos/nb_neg<br>ratio in NN<br>extra task | 1                | 2                | 5                | 10               | 20               |
|--------------------------------------------|------------------|------------------|------------------|------------------|------------------|
| 0                                          | $96.96 \pm 0.25$ | $96.96 \pm 0.25$ | $96.96 \pm 0.25$ | $96.96 \pm 0.25$ | $96.96 \pm 0.25$ |
| 1                                          | $97.04 \pm 0.27$ | $97.05 \pm 0.27$ | $97.1 \pm 0.27$  | $97.14 \pm 0.26$ | $97.18 \pm 0.27$ |
| 10                                         | $97.22 \pm 0.22$ | $97.29 \pm 0.2$  | $97.38 \pm 0.19$ | $97.45 \pm 0.16$ | $97.45 \pm 0.18$ |
| 50                                         | $96.82 \pm 0.15$ | $97.0 \pm 0.16$  | $97.28 \pm 0.15$ | $97.42 \pm 0.15$ | $97.41 \pm 0.12$ |
| 100                                        | $96.54 \pm 0.19$ | $96.79 \pm 0.16$ | $97.24 \pm 0.13$ | $97.35 \pm 0.1$  | $97.36 \pm 0.13$ |

Table 23: Ion Channel dataset: values corresponding to LOO-CV *NN-MT* with sequence based kernel

| nb_pos/nb_neg<br>ratio in NN<br>extra task | 1                | 2                | 5                | 10               | 20               |
|--------------------------------------------|------------------|------------------|------------------|------------------|------------------|
| 0                                          | $96.3 \pm 0.42$  | $96.3 \pm 0.42$  | $96.3 \pm 0.42$  | $96.3 \pm 0.42$  | $96.3 \pm 0.42$  |
| 0                                          | $96.34 \pm 0.17$ | $96.34 \pm 0.17$ | $96.34 \pm 0.17$ | $96.34 \pm 0.17$ | $96.34 \pm 0.17$ |
| 1                                          | $96.56 \pm 0.19$ | $96.64 \pm 0.16$ | $96.69 \pm 0.13$ | $96.67 \pm 0.13$ | $96.66 \pm 0.13$ |
| 10                                         | $96.72 \pm 0.16$ | $96.81 \pm 0.15$ | $96.89 \pm 0.14$ | $96.81 \pm 0.13$ | $96.84 \pm 0.16$ |
| 50                                         | $96.28 \pm 0.16$ | $96.42 \pm 0.15$ | $96.64 \pm 0.15$ | $96.77 \pm 0.13$ | $96.97 \pm 0.14$ |
| 100                                        | $95.39 \pm 0.14$ | $95.73 \pm 0.12$ | $96.38 \pm 0.16$ | $96.74 \pm 0.21$ | $96.98 \pm 0.18$ |

Table 24: Ion Channel dataset: values corresponding to LOO-CV *RN-MT* with family's hierarchy based kernel

| nb_pos/nb_neg<br>ratio in RN<br>extra task | 1                | 2                | 5                | 10               | 20               |
|--------------------------------------------|------------------|------------------|------------------|------------------|------------------|
| 0                                          | $96.3 \pm 0.42$  | $96.3 \pm 0.42$  | $96.3 \pm 0.42$  | $96.3 \pm 0.42$  | $96.3 \pm 0.42$  |
| 0                                          | $96.96 \pm 0.25$ | $96.96 \pm 0.25$ | $96.96 \pm 0.25$ | $96.96 \pm 0.25$ | $96.96 \pm 0.25$ |
| 1                                          | $97.0 \pm 0.25$  | $97.0 \pm 0.25$  | $97.0 \pm 0.25$  | $96.99 \pm 0.25$ | $96.99 \pm 0.25$ |
| 10                                         | $97.22 \pm 0.23$ | $97.21 \pm 0.23$ | $97.2 \pm 0.23$  | $97.19 \pm 0.23$ | $97.19 \pm 0.08$ |
| 50                                         | $97.28 \pm 0.22$ | $97.29 \pm 0.22$ | $97.31 \pm 0.21$ | $97.36 \pm 0.2$  | $97.36 \pm 0.12$ |
| 100                                        | $97.03 \pm 0.29$ | $97.11 \pm 0.26$ | $97.26 \pm 0.23$ | $97.34 \pm 0.19$ | $97.45 \pm 0.14$ |

Table 25: Ion Channel dataset: values corresponding to LOO-CV *RN-MT* with sequence based kernel

| nb_pos/nb_neg<br>ratio in RN<br>extra task | 1                | 2                | 5                | 10               | 20               |
|--------------------------------------------|------------------|------------------|------------------|------------------|------------------|
| 0                                          | $96.34 \pm 0.17$ | $96.34 \pm 0.17$ | $96.34 \pm 0.17$ | $96.34 \pm 0.17$ | $96.34 \pm 0.17$ |
| 1                                          | $96.43 \pm 0.15$ | $96.42 \pm 0.15$ | $96.42 \pm 0.15$ | $96.41 \pm 0.15$ | $96.38 \pm 0.15$ |
| 10                                         | $96.76 \pm 0.12$ | $96.76 \pm 0.12$ | $96.74 \pm 0.12$ | $96.67 \pm 0.11$ | $96.56 \pm 0.11$ |
| 50                                         | $96.81 \pm 0.03$ | $97.01 \pm 0.03$ | $97.06 \pm 0.08$ | $96.92 \pm 0.1$  | $96.7 \pm 0.11$  |
| 100                                        | $96.3 \pm 0.02$  | $96.74 \pm 0.04$ | $97.05 \pm 0.08$ | $96.91 \pm 0.11$ | $96.78 \pm 0.12$ |

Table 26: Kinase dataset: values corresponding to LOO-CV *NN-MT* with family's hierarchy based kernel

| nb_pos/nb_neg<br>ratio in NN<br>extra task | 1                | 2                | 5                | 10               | 20               |
|--------------------------------------------|------------------|------------------|------------------|------------------|------------------|
| 0                                          | $90.99 \pm 0.49$ | $90.99 \pm 0.49$ | $90.99 \pm 0.49$ | $90.99 \pm 0.49$ | $90.99 \pm 0.49$ |
| 1                                          | $89.36 \pm 0.54$ | $89.58 \pm 0.54$ | $89.87 \pm 0.52$ | $90.14 \pm 0.5$  | $90.41 \pm 0.48$ |
| 10                                         | $89.68 \pm 0.51$ | $89.93 \pm 0.51$ | $90.36 \pm 0.53$ | $90.75 \pm 0.52$ | $91.16 \pm 0.46$ |
| 50                                         | $87.78 \pm 0.57$ | $88.48 \pm 0.51$ | $89.57 \pm 0.44$ | $90.54 \pm 0.44$ | $91.28 \pm 0.43$ |
| 100                                        | $86.16 \pm 0.37$ | $87.02 \pm 0.38$ | $88.14 \pm 0.48$ | $89.72 \pm 0.45$ | $90.9 \pm 0.43$  |

Table 27: Kinase dataset: values corresponding to LOO-CV *NN-MT* with sequence based kernel

| nb_pos/nb_neg<br>ratio in NN<br>extra task | 1                | 2                | 5                | 10               | 20               |
|--------------------------------------------|------------------|------------------|------------------|------------------|------------------|
| 0                                          | $89.18 \pm 0.24$ | $89.18 \pm 0.24$ | $89.18 \pm 0.24$ | $89.18 \pm 0.24$ | $89.18 \pm 0.24$ |
| 1                                          | $90.78 \pm 0.44$ | $90.76 \pm 0.46$ | $90.74 \pm 0.46$ | $90.47 \pm 0.5$  | $90.3 \pm 0.49$  |
| 10                                         | $93.23 \pm 0.22$ | $92.94 \pm 0.32$ | $92.53 \pm 0.34$ | $92.18 \pm 0.28$ | $91.51 \pm 0.24$ |
| 50                                         | $91.86 \pm 0.36$ | $91.55 \pm 0.34$ | $91.34 \pm 0.28$ | $91.57 \pm 0.27$ | $91.55 \pm 0.18$ |
| 100                                        | $89.83 \pm 0.32$ | $89.67 \pm 0.28$ | $90.12 \pm 0.33$ | $90.77 \pm 0.19$ | $90.84 \pm 0.19$ |

Table 28: Kinase dataset: values corresponding to LOO-CV *NN-MT* with family’s hierarchy based kernel

| nb_pos/nb_neg ratio in RN extra task | 1                | 2                | 5                | 10               | 20               |
|--------------------------------------|------------------|------------------|------------------|------------------|------------------|
| 0                                    | $90.99 \pm 0.49$ | $90.99 \pm 0.49$ | $90.99 \pm 0.49$ | $90.99 \pm 0.49$ | $90.99 \pm 0.49$ |
| 1                                    | $90.6 \pm 0.49$  | $90.6 \pm 0.49$  | $90.6 \pm 0.49$  | $90.6 \pm 0.49$  | $90.6 \pm 0.49$  |
| 10                                   | $89.59 \pm 0.37$ | $89.62 \pm 0.37$ | $89.71 \pm 0.37$ | $89.84 \pm 0.39$ | $90.11 \pm 0.53$ |
| 50                                   | $87.61 \pm 0.79$ | $88.18 \pm 0.75$ | $89.31 \pm 0.59$ | $90.18 \pm 0.51$ | $90.86 \pm 0.47$ |
| 100                                  | $85.28 \pm 1.13$ | $86.89 \pm 1.04$ | $89.15 \pm 0.76$ | $90.35 \pm 0.56$ | $91.06 \pm 0.48$ |

Table 29: Kinase dataset: values corresponding to LOO-CV *NN-MT* with sequence based kernel

| nb_pos/nb_neg ratio in RN extra task | 1                | 2                | 5                | 10               | 20               |
|--------------------------------------|------------------|------------------|------------------|------------------|------------------|
| 0                                    | $89.18 \pm 0.24$ | $89.18 \pm 0.24$ | $89.18 \pm 0.24$ | $89.18 \pm 0.24$ | $89.18 \pm 0.24$ |
| 1                                    | $89.7 \pm 0.2$   | $89.69 \pm 0.21$ | $89.66 \pm 0.21$ | $89.6 \pm 0.21$  | $89.49 \pm 0.21$ |
| 10                                   | $92.13 \pm 0.21$ | $92.01 \pm 0.22$ | $91.6 \pm 0.22$  | $90.9 \pm 0.18$  | $89.97 \pm 0.33$ |
| 50                                   | $92.74 \pm 0.26$ | $93.21 \pm 0.23$ | $93.39 \pm 0.19$ | $92.34 \pm 0.19$ | $90.45 \pm 0.3$  |
| 100                                  | $91.73 \pm 0.1$  | $92.69 \pm 0.18$ | $93.3 \pm 0.2$   | $92.06 \pm 0.18$ | $90.23 \pm 0.26$ |

## Supporting Information: list of withdrawn drugs

Based on,<sup>1,2</sup> we consider a list of 174 withdrawn drugs:

| name           | year | country             | DrugBank id |
|----------------|------|---------------------|-------------|
| Adderall       | 2005 | Canada              | DB00182     |
| Alatrofloxacin | 2006 | Worldwide           |             |
| Alclofenac     | 1979 | UK                  | DB13167     |
| Alpidem        | 1995 | Worldwide           |             |
| Alosetron      | 2000 | US                  | DB00969     |
| Althesin       | 1984 | France, Germany, UK |             |
| Amineptine     | 1999 | France, US          | DB04836     |

|                            |      |                                                |         |
|----------------------------|------|------------------------------------------------|---------|
| Aminopyrine                | 1999 | France, Thailand                               | DB01424 |
| Amobarbital                | 1980 | Norway                                         |         |
| Amoproxan                  | 1970 | France                                         |         |
| Anagestone                 | 1969 | Germany                                        |         |
| Antrafenine                | 1984 | France                                         |         |
| Aprotinin                  | 2008 | US                                             |         |
| Ardeparin                  | 2001 | US                                             |         |
| Astemizole                 | 1999 | US, Malaysia, Multiple<br>Nonspecified Markets | DB00637 |
| Azaribine                  | 1976 | US                                             |         |
| Bendazac                   | 1993 | Spain                                          |         |
| Benoxaprofen               | 1982 | Germany, Spain, UK, US                         | DB04812 |
| Benzarone                  | 1992 | Germany                                        |         |
| Benziodarone               | 1964 | France, UK                                     |         |
| Beta-ethoxy-lacetanilamide | 1986 | Germany                                        |         |
| Bezitramide                | 2004 | Netherlands                                    |         |
| Bithionol                  | 1967 | US                                             | DB04813 |
| Broazolam                  | 1989 | UK                                             |         |
| Bromfenac                  | 1998 | US                                             |         |
| Bucetin                    | 1986 | Germany                                        |         |
| Buformin                   | 1978 | Germany                                        | DB04830 |
| Bunamiodyl                 | 1963 | Canada, UK, US                                 |         |
| Butamben                   | 1964 | US                                             |         |
| Canrenone                  | 1986 | Germany                                        |         |
| Cerivastatin               | 2001 | US                                             | DB00439 |
| Chlormadinone              | 1970 | UK, US                                         |         |

|                         |       |                                         |         |
|-------------------------|-------|-----------------------------------------|---------|
| Chlormezanone           | 1996  | European Union, US, South Africa, Japan | DB01178 |
| Chlorphentermine        | 1969  | Germany                                 | DB01556 |
| Cianidanol              | 1985  | France, Germany, Spain, Sweden          |         |
| Cinepazide              | 1988  | Spain                                   |         |
| Cisapride               | 2000  | US                                      |         |
| Clioquinol              | 1973  | France, Germany, UK, US                 | DB04815 |
| Clobutinol              | 2007  | Germany                                 |         |
| Cloforex                | 1969  | Germany                                 | DB00631 |
| Clomacron               | 1982  | UK                                      |         |
| Clometacin              | 1987  | France                                  |         |
| Co-proxamol             | 2004  | UK                                      |         |
| Cyclobarbitol           | 1980  | Norway                                  |         |
| Cyclofenil              | 1987  | France                                  |         |
| Dantron                 | 1963  | Canada, UK, US                          |         |
| Dexfenfluramine         | 1997  | European Union, UK, US                  | DB01191 |
| Propoxyphene            | 2010  | Worldwide                               | DB00647 |
| Diacetoxydiphenolisatin | 1971  | Australia                               |         |
| Diethylstilbestrol      | 1970s |                                         | DB00255 |
| Difemerine              | 1986  | Germany                                 |         |
| Dihydrostreptomycin     | 1970  | US                                      |         |
| Dilevalol               | 1990  | UK                                      |         |
| Dimazole                | 1972  | France, US                              |         |
| Dimethylamylamine       | 1983  | US                                      |         |
| Dinoprostone            | 1990  | UK                                      |         |

|               |      |                                                        |         |
|---------------|------|--------------------------------------------------------|---------|
| Dipyron       | 1975 | UK, US, Others                                         |         |
| Dithiazanine  | 1964 | France, US                                             |         |
| Dofetilide    | 2004 | Germany                                                | DB00204 |
| Drotrecogin   | 2011 | Worldwide                                              |         |
| Ebrotidine    | 1998 | Spain                                                  |         |
| Efalizumab    | 2009 | Germany                                                |         |
| Encainide     | 1991 | UK, US                                                 | DB01288 |
| Ethyl         | 1963 | Canada, UK, US,                                        |         |
| Etretinate    | 1989 | France                                                 | DB00926 |
| Exifone       | 1989 | France                                                 |         |
| Fen-phen      | 1997 |                                                        |         |
| Fenclofenac   | 1984 | UK                                                     |         |
| Fenclozic     | 1970 | UK, US                                                 |         |
| Fenfluramine  | 1997 | European Union, UK, US,<br>India, South Africa, others | DB00574 |
| Fenoterol     | 1990 | New Zealand                                            | DB01288 |
| Feprazone     | 1984 | Germany, UK                                            |         |
| Fipexide      | 1991 | France                                                 |         |
| Flosequinan   | 1993 | UK, US                                                 |         |
| Flunitrazepam | 1991 | France                                                 |         |
| Gatifloxacin  | 2006 | US                                                     | DB01044 |
| Gemtuzumab    | 2010 | US                                                     |         |
| Glafenine     | 1984 | France, Germany                                        |         |
| Grepafloxacin | 1999 | Withdrawn Germany, UK,<br>US others                    | DB00365 |
| Hydromorphone | 2005 |                                                        |         |

|                    |             |                                                                       |         |
|--------------------|-------------|-----------------------------------------------------------------------|---------|
| Ibufenac           | 1968        | UK                                                                    |         |
| Indalpine          | 1985        | France                                                                | DB08953 |
| Indoprofen         | 1983        | Germany, Spain, UK                                                    | DB08951 |
| Iodinated          | 1964        | US                                                                    |         |
| Iproniazid         | 1964        | Canada                                                                | DB04818 |
| Isaxonine          | 1984        | France                                                                |         |
| Isoxicam           | 1983        | France, Germany, Spain,<br>others                                     | DB08942 |
| Kava               | 2002        | Germany                                                               |         |
| Ketorolac          | 1993        | France, Germany, others                                               | DB00465 |
| L-tryptophan       | 1989        | Germany, UK                                                           |         |
| Levamisole         | 1999        | US                                                                    |         |
| Levomethadyl       | 2003        | US                                                                    | DB01227 |
| Lumiracoxib        | 2007–2008   | Worldwide                                                             |         |
| Lysergic           | 1950s–1960s |                                                                       |         |
| Mebanzine          | 1975        | UK                                                                    |         |
| Methandrostenolone | 1982        | France, Germany, UK, US,<br>others                                    |         |
| Methapyrilene      | 1979        | Germany, UK, US                                                       |         |
| Methaqualone       | 1984        | South Africa (1971), In-<br>dia (1984), United Nations<br>(1971-1988) |         |
| Metipranolol       | 1990        | UK, others                                                            | DB01214 |
| Metofoline         | 1965        | US                                                                    |         |
| Mibefradil         | 1998        | European Union, Malaysia,<br>US, others                               |         |

|                  |           |                                        |         |
|------------------|-----------|----------------------------------------|---------|
| Minaprine        | 1996      | France                                 | DB00805 |
| Moxisylyte       | 1993      | France                                 |         |
| Muzolimine       | 1987      | France, Germany, European Union        |         |
| Natalizumab      | 2005-2006 | US                                     |         |
| Nefazodone       | 2007      | US, Canada, others                     |         |
| Nialamide        | 1974      | UK, US                                 |         |
| Nikethamide      | 1988      | multiple markets                       | DB08989 |
| Nitrefazole      | 1984      | Germany                                |         |
| Nomifensine      | 1981-1986 | France, Germany, Spain, UK, US, others | DB4821  |
| Oxeladin         | 1976      | Canada, UK, US (1976)                  |         |
| Oxyphenbutazone  | 1984-1985 | UK, US, Germany, France, Canada        | DB03585 |
| Oxyphenisatin    |           | Australia, France, Germany, UK, US     |         |
| Ozogamicin       | 2010      | US                                     |         |
| Pemoline         | 1982      |                                        | DB01230 |
| Pentobarbital    | 1980      | Norway                                 |         |
| Pemoline         | 1982      |                                        | DB01230 |
| Pergolide        | 2007      | US                                     | DB01186 |
| Perhexilene      | 1985      | UK, Spain                              | DB01074 |
| Phenacetin       | 1975      | Canada                                 | DB03783 |
| Phenformin       | 1977      | France, Germany US                     | DB00914 |
| Phenolphthalein  | 1997      | US                                     | DB04824 |
| Phenoxypropazine | 1966      | UK                                     |         |



|                     |      |                                                                                                                                                                                    |         |
|---------------------|------|------------------------------------------------------------------------------------------------------------------------------------------------------------------------------------|---------|
| Phenylbutazone      | 1985 | Germany                                                                                                                                                                            |         |
| Phenylpropanolamine | 2000 | Canada, US                                                                                                                                                                         | DB00397 |
| Pifoxime            | 1976 | France                                                                                                                                                                             |         |
| Pirprofen           | 1990 | France, Germany, Spain                                                                                                                                                             |         |
| Prenylamine         | 1988 | Canada, France, Germany,<br>UK, US, others                                                                                                                                         | DB04825 |
| Proglumide          | 1989 | Germany                                                                                                                                                                            |         |
| Pronethalol         | 1965 | UK                                                                                                                                                                                 |         |
| Propanidid          | 1983 | UK                                                                                                                                                                                 |         |
| Proxibarbal         | 1998 | Spain, France, Italy, Portu-<br>gal, Turkey                                                                                                                                        |         |
| Pyrovalerone        | 1979 | France                                                                                                                                                                             |         |
| Rapacuronium        | 2001 | US, multiple markets                                                                                                                                                               | DB04834 |
| Remoxipride         | 1993 | UK, others                                                                                                                                                                         | DB00409 |
| Rimonabant          | 2008 | Worldwide                                                                                                                                                                          | DB06155 |
| Rofecoxib           | 2004 | Worldwide                                                                                                                                                                          | DB00533 |
| Rosiglitazone       | 2010 | Europe                                                                                                                                                                             | DB00412 |
| Secobarbital        |      | France, Norway, others.                                                                                                                                                            |         |
| Sertindole          | 1998 | European Union                                                                                                                                                                     | DB06144 |
| Sibutramine         | 2010 | Australia, Canada, China,<br>the European Union (EU),<br>Hong Kong, India, Mexico,<br>New Zealand, the Philip-<br>pines, Thailand, the United<br>Kingdom, and the United<br>States | DB01105 |

|                        |           |                                           |         |
|------------------------|-----------|-------------------------------------------|---------|
| Sitaxentan             | 2010      | Germany                                   |         |
| Sorivudine             | 1993      | Japan                                     |         |
| Sparfloxacin           | 2001      | US                                        | DB01208 |
| Sulfacarbamide         | 1988      | Germany                                   |         |
| Sulfamethoxydiazine    | 1988      | Germany                                   |         |
| Sulfamethoxypyridazine | 1986      | UK                                        |         |
| Suloctidyl             | 1985      | Germany, France, Spain                    |         |
| Suprofen               | 1986-1987 | UK, Spain, US                             | DB00870 |
| Tegaserod              | 2007      | US                                        | DB01079 |
| Temafloxacin           | 1992      | US                                        | DB01405 |
| Temafloxacin           | 1992      | US                                        | DB01405 |
| Temazepam              | 1999      | Sweden, Norway                            |         |
| Terfenadine            | 1997-1998 | France, South Africa,<br>Oman, others, US | DB00342 |
| Terodiline             | 1991      | Germany, UK, Spain, others                |         |
| Tetrazepam             | 2013      | European Union                            |         |
| Thalidomide            | 1961      | Germany                                   | DB01041 |
| Thenalidine            | 1960      | Canada, UK, US                            | DB04826 |
| Thiobutabarbitone      | 1993      | Germany                                   |         |
| Thioridazine           | 2005      | Germany, UK                               | DB00679 |
| Ticrynafen             | 1980      | Germany, France, UK, US<br>others         |         |
| Tolcapone              | 1998      | European Union, Canada,<br>Australia      |         |

|                         |           |                                                    |         |
|-------------------------|-----------|----------------------------------------------------|---------|
| Tolrestat               | 1996      | Argentina, Canada, Italy, others                   |         |
| Triacetyldiphenolisatin | 1971      | Australia                                          |         |
| Triazolam               | 1991      | France, Netherlands, Finland, Argentina, UK others | DB00897 |
| Triparanol              | 1962      | France, US                                         |         |
| Troglitazone            | 2000      | US, Germany                                        |         |
| Trovafloxacin           | 1999-2001 | European Union, US                                 |         |
| Valdecoxib              | 2004      | US                                                 | DB00580 |
| Vincamine               | 1987      | Germany                                            |         |
| Xenazoic                | 1965      | France                                             |         |
| Ximelagatran            | 2006      | Germany                                            |         |
| Zimelidine              | 1983      | Worldwide                                          | DB04832 |
| Zomepirac               | 1983      | UK, Germany, Spain, US                             | DB04828 |

Table 30: List of withdrawn drugs

We only considered withdrawn drugs for which we identified a DrugBank ID, we predicted targets and for which the side effects is specific and secondary target responsible for the side-effect has not been identified yet. This is the list of considered withdrawn drugs:

| name            | year | country                | DrugBank id |
|-----------------|------|------------------------|-------------|
| Alosetron       | 2000 | US                     | DB00969     |
| Adderall        | 2005 | Canada                 | DB00182     |
| Cerivastatin    | 2001 | US                     | DB00439     |
| Cloforex        | 1969 | Germany                | DB00631     |
| Dexfenfluramine | 1997 | European Union, UK, US | DB01191     |
| Propoxyphene    | 2010 | Worldwide              | DB00647     |

|                     |           |                                                        |         |
|---------------------|-----------|--------------------------------------------------------|---------|
| Zimelidine          | 1983      | Worldwide                                              | DB04832 |
| Dofetilide          | 2004      | Germany                                                | DB00204 |
| Encainide           | 1991      | UK, US                                                 | DB01288 |
| Etretinate          | 1989      | France                                                 | DB00926 |
| Fenfluramine        | 1997      | European Union, UK, US,<br>India, South Africa, others | DB00574 |
| Fenoterol           | 1990      | New Zealand                                            | DB01288 |
| Levomethadyl        | 2003      | US                                                     | DB01227 |
| Metipranolol        | 1990      | UK, others                                             | DB01214 |
| Minaprine           | 1996      | France                                                 | DB00805 |
| Astemizole          | 1999      | US, Malaysia, Multiple<br>Nonspecified Markets         | DB00637 |
| Oxyphenbutazone     | 1984-1985 | UK, US, Germany, France,<br>Canada                     | DB03585 |
| Bithionol           | 1967      | US                                                     | DB04813 |
| Pergolide           | 2007      | US                                                     | DB01186 |
| Phenacetin          | 1975      | Canada                                                 | DB03783 |
| Phenformin          | 1977      | France, Germany US                                     | DB00914 |
| Phenolphthalein     | 1997      | US                                                     | DB04824 |
| Diethylstilbestrol  | 1970s     |                                                        | DB00255 |
| Phenylpropanolamine | 2000      | Canada, US                                             | DB00397 |
| Prenylamine         | 1988      | Canada, France, Germany,<br>UK, US, others             | DB04825 |
| Remoxipride         | 1993      | UK, others                                             | DB00409 |
| Rimonabant          | 2008      | Worldwide                                              | DB06155 |
| Rofecoxib           | 2004      | Worldwide                                              | DB00533 |

|               |           |                                                                                                                                                                |         |
|---------------|-----------|----------------------------------------------------------------------------------------------------------------------------------------------------------------|---------|
| Rosiglitazone | 2010      | Europe                                                                                                                                                         | DB00412 |
| Sertindole    | 1998      | European Union                                                                                                                                                 | DB06144 |
| Sibutramine   | 2010      | Australia, Canada, China, the European Union (EU), Hong Kong, India, Mexico, New Zealand, the Philippines, Thailand, the United Kingdom, and the United States | DB01105 |
| Sparfloxacin  | 2001      | US                                                                                                                                                             | DB01208 |
| Tegaserod     | 2007      | US                                                                                                                                                             | DB01079 |
| Terfenadine   | 1997-1998 | France, South Africa, Oman, others, US                                                                                                                         | DB00342 |
| Thalidomide   | 1961      | Germany                                                                                                                                                        | DB01041 |
| Valdecoxib    | 2004      | US                                                                                                                                                             | DB00580 |

Table 31: List of considered withdrawn drugs

## Supporting Information: basic principles of SVM and Kernel Ridge Regression

In this section, we briefly recall the basic principles of SVM and Kernel Ridge Regression.

- Support Vector Machines<sup>3</sup> seeks to find the optimal hyperplane separating two classes of data points, for example, proteins that bind to a ligand and proteins that don't. Among the infinity of possible separating hyperplanes, the optimal hyperplane is the one which on the first hand, maximizes the margin defined as the closest distance from

any point to the separating hyperplane, and on the second hand, allows a small number of training errors. The trade-off between the optimization of the margin and the number of training errors is controlled via a parameter  $C$ .

In practice, given a set of labeled samples  $S = \{(x_1, y_1), \dots, (x_N, y_N)\}$  where  $(x_i, y_i) \in X \times \{-1, +1\}$  for  $i = 1, \dots, N$ , a constant  $b$ , and the normal vector parameterizing the separating hyperplane  $w$ , the SVM algorithm solves the following optimization problem:

$$\min \left[ \frac{1}{n} \sum_{i=1}^n \max(0, 1 - y_i \langle w, x_i \rangle + b) \right] + \frac{1}{C} |w|^2 \quad (1)$$

It can be rewritten via the so-called slack variables  $v_i = \max(0, 1 - y_i \langle w, x_i \rangle + b)$  as

$$\operatorname{argmin}_{w, b, \epsilon} \frac{1}{2} |w|^2 + C \sum_{i=1}^l \epsilon_i \quad (2a)$$

$$\text{subject to } y_i \langle w, x_i \rangle + b \geq 1 - \epsilon_i, \forall i = 1, \dots, l, \quad (2b)$$

$$\epsilon_i \geq 0, i = 1, \dots, l. \quad (2c)$$

The constant  $C$  in the objective function 2a is meant to introduce a trade-off between the maximization of the margin, expressed by the term  $\frac{1}{2} ||w||^2$ , and the classification error on the training set, expressed by the slack variables. In the present study, the optimal parameter  $C$  was searched between  $10^{-5}$  and  $10^5$ .

Once the SVM algorithm has learned the hyperplane separating the two classes, it predicts labels for new points according to their position with respect to this hyperplane. It provides a prediction score based on the distance of the new points to the learned hyperplane.

- Kernel Ridge Regression<sup>4</sup> is the kernelized version of a linear regression with  $L_2$  norm

regularization which aims at solving the following optimization problem:

$$\min_{\mathbf{w}} \|\mathbf{X}^T \cdot \mathbf{w} - \mathbf{y}\| + \lambda \|\mathbf{w}\|^2 \quad (3)$$

where  $\mathbf{X}$  is the n\_samples\*n\_features feature matrix,  $\mathbf{y}$  the output vector and  $\mathbf{w}$  the weight vector. As a kernel method, kernel RLS fully benefits from the kernel trick. The output of Kernel RLS is the score of the predicted protein-ligand interaction. The regularizing parameter of the kernel RLS was searched between  $10^{-5}$  and  $10^5$ .

In the case of an unbalanced number of positive and negative samples in the training set, a weight, inversely proportional to the proportion of sample of the corresponding class, was assigned to samples during the training phase.

## References

- (1) Qureshi, Z. P.; Seoane-Vazquez, E.; Rodriguez-Monguio, R.; Stevenson, K. B.; Szeinbach, S. L. *Pharmacoepidemiology and drug safety* **2011**, *20*, 772–777.
- (2) Fung, M.; Thornton, A.; Mybeck, K.; Wu, J. H.-h.; Hornbuckle, K.; Muniz, E. *Drug Information Journal* **2001**, *35*, 293–317.
- (3) Cortes, C.; Vapnik, V. *Machine learning* **1995**, *20*, 273–297.
- (4) Saunders, C.; Gammerman, A.; Vovk, V. **1998**,
